# Supplementary material for: Influencing factors of weak grip strength and fall: a study based on the China Health and Retirement Longitudinal Study (CHARLS)
Source: Springer Nature journal article supplement (doi:10.1186/s12889-022-14753-x), 2022-12-13
Supplement: MOESM1 [file 23821200]

**Supplementary Table 1. Logistic regression results of risk factors of fall**

| fall                     |      | OR    | <i>P</i> value | 95% CI      |
|--------------------------|------|-------|----------------|-------------|
| female                   |      | 1.382 | <0.001         | 1.240-1.541 |
| symptomatic              | knee | 1.113 | 0.258          | 0.924-1.342 |
| osteoarthritis           |      |       |                |             |
| depression               |      | 1.516 | <0.001         | 1.354-1.699 |
| weak grip strength       |      | 1.264 | 0.003          | 1.086-1.471 |
| education**              |      | 0.996 | 0.779          | 0.967-1.025 |
| hypertension             |      | 1.067 | 0.304          | 0.943-1.209 |
| chronic lung disease     |      | 1.081 | 0.361          | 0.915-1.278 |
| heart problems           |      | 0.979 | 0.801          | 0.833-1.152 |
| ischemic stroke          |      | 1.786 | 0.001          | 1.259-2.534 |
| kidney disease           |      | 1.344 | 0.004          | 1.102-1.640 |
| gastrointestinal disease |      | 1.066 | 0.301          | 0.944-1.203 |
| rheumatoid arthritis     |      | 1.354 | <0.001         | 1.206-1.520 |
| BMI**                    |      | 0.945 | 0.091          | 0.886-1.009 |
| age**                    |      | 1.212 | <0.001         | 1.144-1.283 |

BMI-body mass index; OR-odds ratio; CI-Confidence Interval; \*\*education, BMI, age were

included in this model as ordered categorical variables

**Supplementary Table 2. Logistic regression results of fall in male group**

| fall                            | OR    | <i>P</i> value | 95% CI        |
|---------------------------------|-------|----------------|---------------|
| symptomatic knee osteoarthritis | 1.579 | 0.003          | 1.168 - 2.133 |
| depression                      | 1.589 | 0.000          | 1.326 - 1.904 |
| weak grip strength              | 1.741 | 0.000          | 1.389 - 2.183 |
| education**                     | 0.981 | 0.406          | 0.937 - 1.027 |
| hypertension                    | 1.037 | 0.717          | 0.853 - 1.261 |
| chronic lung disease            | 1.117 | 0.352          | 0.885 - 1.412 |
| heart problems                  | 1.020 | 0.883          | 0.784 - 1.328 |
| ischemic stroke                 | 1.851 | 0.013          | 1.137 - 3.013 |
| kidney disease                  | 1.123 | 0.427          | 0.844 - 1.493 |
| gastrointestinal disease        | 1.048 | 0.621          | 0.869 - 1.264 |
| rheumatoid arthritis            | 1.313 | 0.003          | 1.098 - 1.570 |
| BMI**                           | 0.886 | 0.025          | 0.797 - 0.985 |
| age**                           | 1.079 | 0.092          | 0.987 - 1.180 |

BMI-body mass index; OR-odds ratio; CI-Confidence Interval; \*\*education, age, BMI were included in this model as ordered categorical variables

**Supplementary Table 3. Stepwise logistic regression results of fall in male group**

| fall                            | OR    | <i>P</i> value | 95% CI        |
|---------------------------------|-------|----------------|---------------|
| symptomatic knee osteoarthritis | 1.630 | 0.001          | 1.210 - 2.196 |
| depression                      | 1.627 | 0.000          | 1.361 - 1.944 |
| weak grip strength              | 1.762 | 0.000          | 1.407 - 2.206 |
| rheumatoid arthritis            | 1.339 | 0.001          | 1.122 - 1.598 |
| BMI**                           | 0.883 | 0.016          | 0.798 - 0.977 |
| ischemic stroke                 | 1.868 | 0.011          | 1.156 - 3.019 |
| age**                           | 1.097 | 0.031          | 1.008 - 1.193 |

BMI-body mass index; OR-odds ratio; CI-Confidence Interval; \*\*age, BMI were included in this model as ordered categorical variables

Supplementary Figure 1. LASSO regression model of fall in male group: Shrinkage of coefficients by hyperparameter ( $\lambda$ )

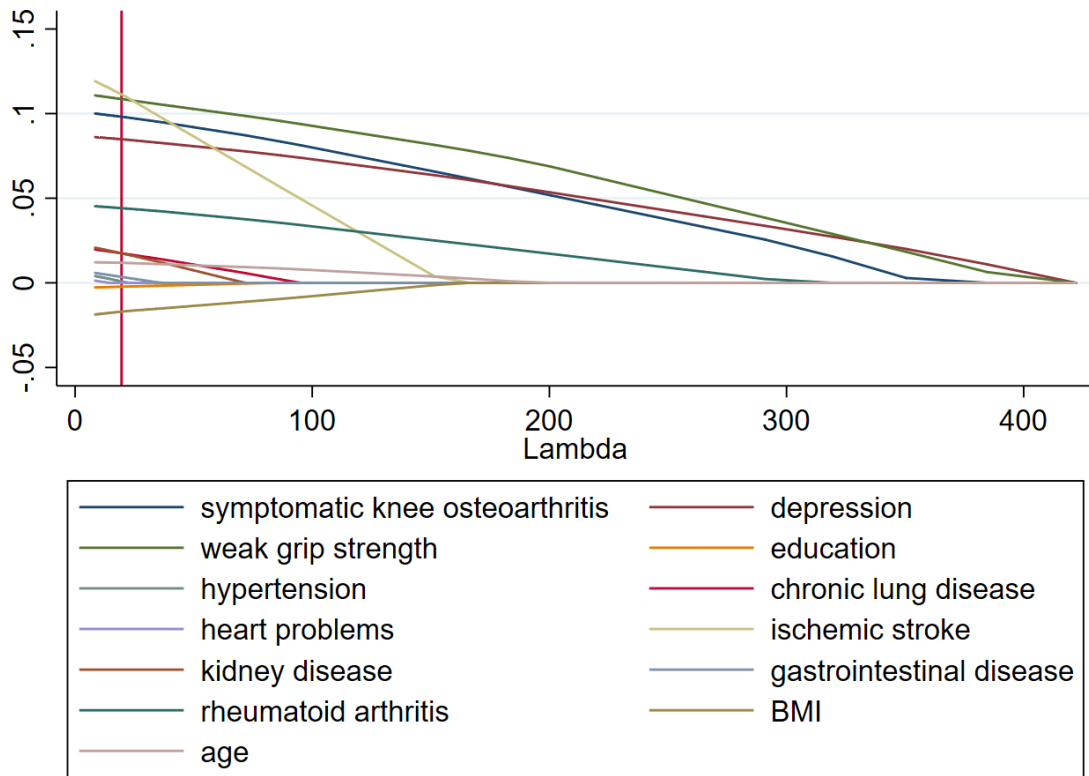

\*The optimal lambda was 19.591

**Supplementary Table 4. Logistic regression results of fall in female group**

| fall                            | OR    | <i>P</i> value | 95% CI        |
|---------------------------------|-------|----------------|---------------|
| symptomatic knee osteoarthritis | 0.916 | 0.468          | 0.722 - 1.162 |
| depression                      | 1.476 | 0.000          | 1.274 - 1.709 |
| weak grip strength              | 0.988 | 0.906          | 0.804 - 1.213 |
| education**                     | 1.008 | 0.676          | 0.970 - 1.048 |
| hypertension                    | 1.081 | 0.349          | 0.919 - 1.272 |
| chronic lung disease            | 1.040 | 0.752          | 0.817 - 1.324 |
| heart problems                  | 0.969 | 0.763          | 0.787 - 1.192 |
| ischemic stroke                 | 1.758 | 0.029          | 1.058 - 2.922 |
| kidney disease                  | 1.598 | 0.001          | 1.204 - 2.121 |
| gastrointestinal disease        | 1.095 | 0.268          | 0.933 - 1.285 |
| rheumatoid arthritis            | 1.358 | 0.000          | 1.165 - 1.583 |
| BMI**                           | 0.988 | 0.773          | 0.909 - 1.074 |
| age**                           | 1.318 | 0.000          | 1.223 - 1.420 |

BMI-body mass index; OR-odds ratio; CI-Confidence Interval; \*\*education, age, BMI were included in this model as ordered categorical variables

**Supplementary Table 5. Stepwise logistic regression results of fall in female group**

| fall                 | OR    | <i>P</i> value | 95% CI        |
|----------------------|-------|----------------|---------------|
| ischemic stroke      | 1.770 | 0.027          | 1.067 - 2.935 |
| depression           | 1.473 | 0.000          | 1.278 - 1.698 |
| age                  | 1.316 | 0.000          | 1.229 - 1.408 |
| kidney disease       | 1.615 | 0.001          | 1.220 - 2.137 |
| rheumatoid arthritis | 1.347 | 0.000          | 1.173 - 1.547 |

OR-odds ratio; CI-Confidence Interval; \*\* age were included in this model as ordered categorical variables

**Supplementary Figure 2. LASSO regression model of fall in female group: Shrinkage of coefficients by hyperparameter ( $\lambda$ )**

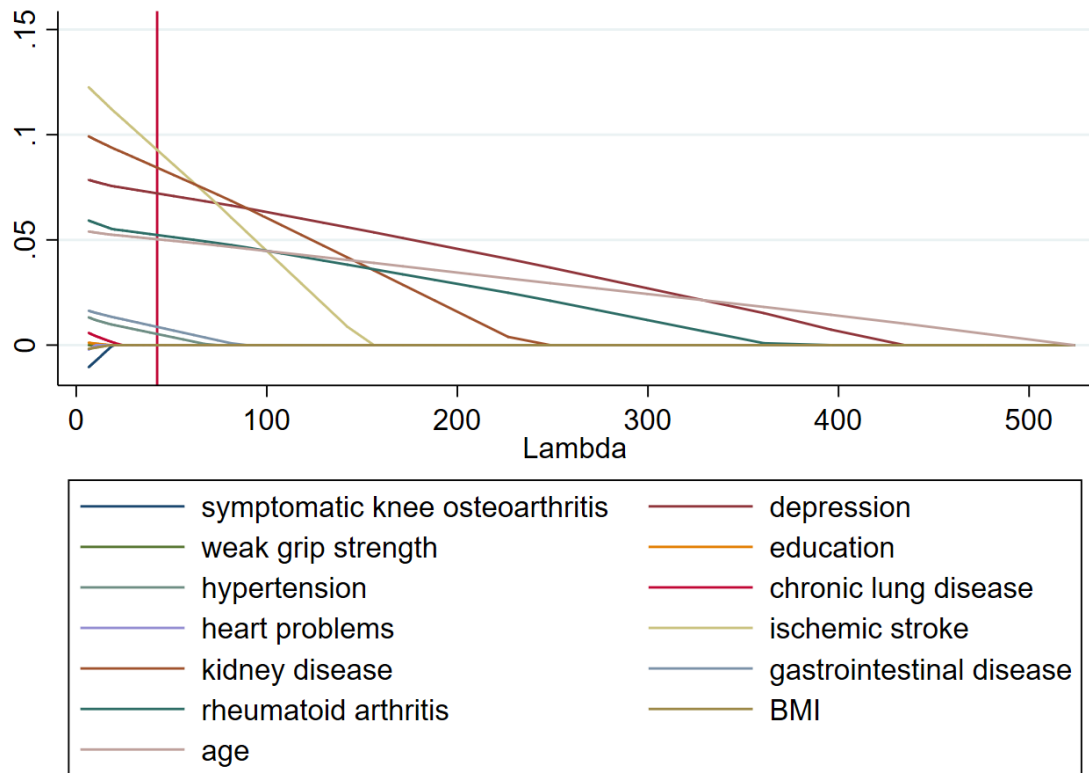

\*The optimal lambda was 42.466

**Supplementary Table 6. Logistic regression results of weak grip strength**

| weak grip strength              | OR    | <i>P</i> value | 95% CI      |
|---------------------------------|-------|----------------|-------------|
| female                          | 1.187 | 0.349          | 0.829-1.701 |
| living in rural area            | 1.703 | 0.037          | 1.033-2.806 |
| education**                     | 0.915 | 0.063          | 0.833-1.005 |
| age**                           | 1.993 | <0.001         | 1.670-2.378 |
| physical activity level**       | 1.261 | 0.063          | 0.988-1.611 |
| BMI**                           | 0.834 | 0.071          | 0.686-1.015 |
| drinking alcohol                | 1.217 | 0.107          | 0.958-1.545 |
| depression                      | 1.366 | 0.059          | 0.988-1.887 |
| symptomatic knee osteoarthritis | 1.912 | 0.012          | 1.156-3.164 |
| hypertension                    | 1.370 | 0.081          | 0.962-1.953 |
| chronic lung disease            | 1.031 | 0.904          | 0.629-1.689 |
| heart problems                  | 1.335 | 0.196          | 0.862-2.068 |
| ischemic stroke                 | 1.268 | 0.569          | 0.561-2.866 |
| memory related problems         | 0.390 | 0.377          | 0.049-3.142 |
| rheumatoid arthritis            | 0.791 | 0.214          | 0.547-1.144 |
| asthma                          | 0.985 | 0.968          | 0.465-2.085 |

BMI-body mass index; OR-odds ratio; CI-Confidence Interval; \*\*education, age, BMI, physical activity level were included in this model as ordered categorical variables

**Supplementary Table 7. Logistic regression results of weak grip strength in male group**

| weak grip strength              | OR    | <i>P</i> value | 95% CI        |
|---------------------------------|-------|----------------|---------------|
| living in rural area            | 1.970 | 0.119          | 0.840 - 4.625 |
| education**                     | 0.951 | 0.512          | 0.817 - 1.106 |
| age**                           | 2.474 | 0.000          | 1.806 - 3.387 |
| physical activity level**       | 1.257 | 0.302          | 0.814 - 1.940 |
| BMI**                           | 0.731 | 0.074          | 0.519 - 1.031 |
| drinking alcohol                | 1.267 | 0.121          | 0.939 - 1.710 |
| depression                      | 1.058 | 0.851          | 0.589 - 1.899 |
| symptomatic knee osteoarthritis | 2.689 | 0.038          | 1.055 - 6.856 |
| hypertension                    | 2.073 | 0.018          | 1.134 - 3.790 |
| chronic lung disease            | 0.749 | 0.467          | 0.343 - 1.635 |
| heart problems                  | 1.482 | 0.302          | 0.702 - 3.125 |
| ischemic stroke                 | 0.951 | 0.942          | 0.246 - 3.673 |
| memory related problems         | 0.618 | 0.663          | 0.071 - 5.371 |
| rheumatoid arthritis            | 0.780 | 0.436          | 0.417 - 1.458 |
| asthma                          | 1.296 | 0.653          | 0.418 - 4.022 |

BMI-body mass index; OR-odds ratio; CI-Confidence Interval; \*\*education, BMI, age, physical activity level were included in this model as ordered categorical variables

**Supplementary Table 8. Stepwise logistic regression results of weak grip strength in male**

**group**

| weak grip strength              | OR    | <i>P</i> value | 95% CI        |
|---------------------------------|-------|----------------|---------------|
| living in rural area            | 2.601 | 0.020          | 1.161 - 5.830 |
| symptomatic knee osteoarthritis | 2.361 | 0.027          | 1.104 - 5.045 |
| age**                           | 2.571 | 0.000          | 1.920 - 3.442 |
| hypertension                    | 1.898 | 0.016          | 1.125 - 3.204 |

\*\*age was included in this model as ordered categorical variables

**Supplementary Figure 3. LASSO regression model of weak grip strength in male group:**

**Shrinkage of coefficients by hyperparameter ( $\lambda$ )**

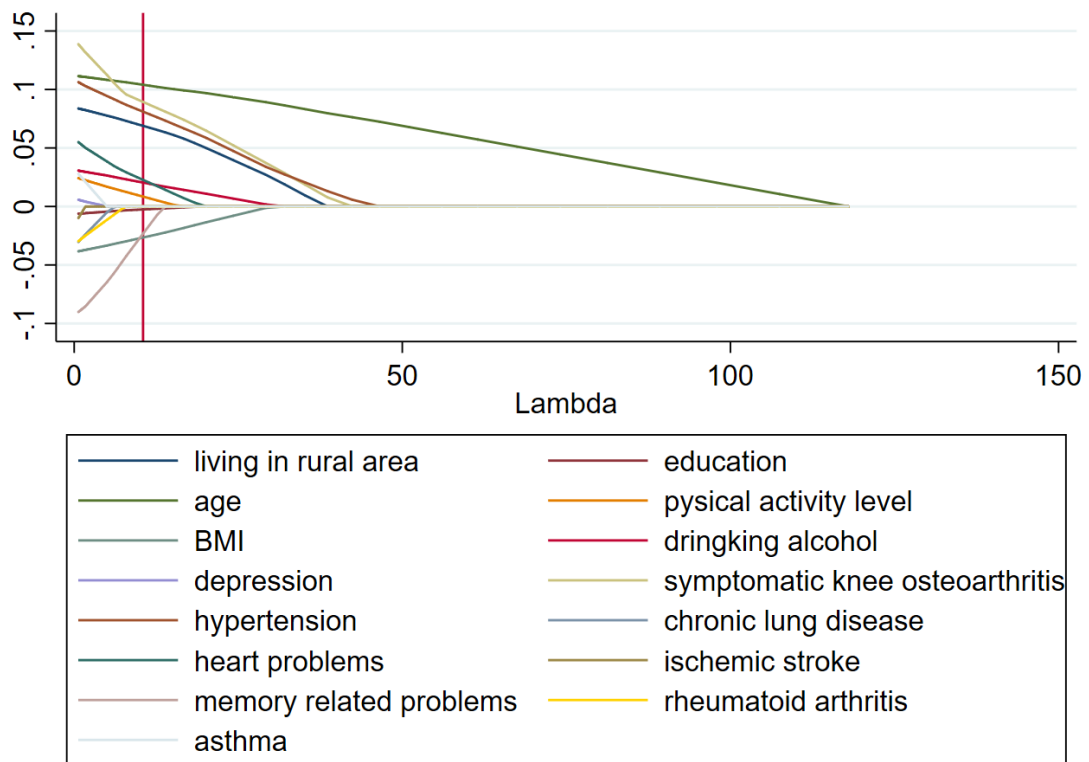

\*The optimal lambda was 10.5



**Supplementary Table 9. Logistic regression results of weak grip strength in female group**

| weak grip strength              | OR    | <i>P</i> value | 95% CI        |
|---------------------------------|-------|----------------|---------------|
| living in rural area            | 1.498 | 0.201          | 0.807 - 2.782 |
| education**                     | 0.879 | 0.041          | 0.777 - 0.995 |
| age**                           | 1.804 | 0.000          | 1.448 - 2.247 |
| physical activity level**       | 1.251 | 0.142          | 0.928 - 1.687 |
| BMI**                           | 0.887 | 0.329          | 0.696 - 1.129 |
| drinking alcohol                | 1.128 | 0.598          | 0.721 - 1.766 |
| depression                      | 1.560 | 0.027          | 1.052 - 2.315 |
| symptomatic knee osteoarthritis | 1.710 | 0.086          | 0.926 - 3.159 |
| hypertension                    | 1.081 | 0.731          | 0.692 - 1.689 |
| chronic lung disease            | 1.247 | 0.509          | 0.648 - 2.400 |
| heart problems                  | 1.251 | 0.428          | 0.719 - 2.179 |
| ischemic stroke                 | 1.568 | 0.402          | 0.548 - 4.486 |
| rheumatoid arthritis            | 0.817 | 0.391          | 0.514 - 1.298 |
| asthma                          | 0.809 | 0.693          | 0.282 - 2.322 |

BMI-body mass index; OR-odds ratio; CI-Confidence Interval; \*\*education, BMI, age, physical activity level were included in this model as ordered categorical variables

**Supplementary Table 10. Stepwise logistic regression results of weak grip strength in female****group**

| weak grip strength | OR    | <i>P</i> value | 95% CI        |
|--------------------|-------|----------------|---------------|
| depression         | 1.801 | 0.002          | 1.241 - 2.613 |
| education**        | 0.855 | 0.008          | 0.762 - 0.960 |
| age**              | 1.793 | 0.000          | 1.463 - 2.197 |

\*\*education, age were included in this model as ordered categorical variables

Supplementary Figure 4. LASSO regression model of weak grip strength in female group:

Shrinkage of coefficients by hyperparameter ( $\lambda$ )

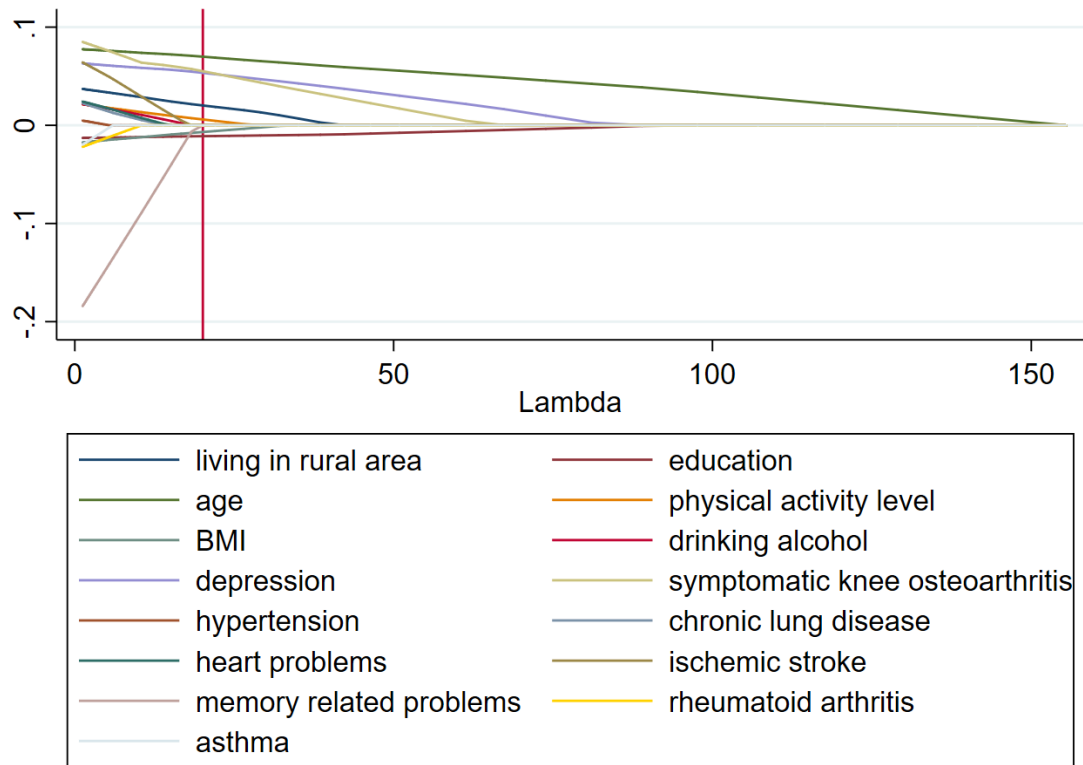

\*The optimal lambda was 20.08
